# Supplementary material for: Defining timeliness in care for patients with lung cancer: a scoping review
Source: HighWire-hosted journal article supplement (doi:10.1136/bmjopen-2021-056895), 2022-04-01
Supplement: bmjopen-2021-056895supp001_data_supplement.pdf [file bmjopen-2021-056895supp001_data_supplement.pdf]

## Search strategy for different database

| Database | Search strategy                                                                                                                                                                                                                                                                                                                                                                                                                                                                                                                                                                                                                                                                                                                                                                                                                                                                                                                                                                                                                                                                                                                                                                                                                                                                                                                                                                                                                                                                                                                                                                                                                                                                                                                                                                                                                                                                                                                                                                                                                                                                   |
|----------|-----------------------------------------------------------------------------------------------------------------------------------------------------------------------------------------------------------------------------------------------------------------------------------------------------------------------------------------------------------------------------------------------------------------------------------------------------------------------------------------------------------------------------------------------------------------------------------------------------------------------------------------------------------------------------------------------------------------------------------------------------------------------------------------------------------------------------------------------------------------------------------------------------------------------------------------------------------------------------------------------------------------------------------------------------------------------------------------------------------------------------------------------------------------------------------------------------------------------------------------------------------------------------------------------------------------------------------------------------------------------------------------------------------------------------------------------------------------------------------------------------------------------------------------------------------------------------------------------------------------------------------------------------------------------------------------------------------------------------------------------------------------------------------------------------------------------------------------------------------------------------------------------------------------------------------------------------------------------------------------------------------------------------------------------------------------------------------|
| Medline  | exp Lung Neoplasms/ OR exp Carcinoma, Non-Small-Cell Lung/ OR exp Carcinoma, Small Cell/ OR adenocarcinoma/ OR exp adenocarcinoma, bronchiolo-alveolar/ OR exp pulmonary adenomatosis, ovine/ AND General Practitioners/ OR Family Practice/ OR General Practice/ OR Primary Health Care/ OR Secondary healthcare.mp. OR Patient Admission/ OR exp Tertiary Healthcare/ OR Hospitals, Public/ OR Hospitals, Private/ OR Hospitals, Special/ OR Palliative Care/ OR exp Pulmonologists/ OR exp Oncologists/ OR exp surgical oncology/ OR exp thoracic surgery/ OR "Referral and Consultation"/ AND Diagnostic timelines.mp. OR Delay.mp. OR exp "Early Detection of Cancer"/ OR Primary delay.mp. OR Secondary delay.mp. OR Tertiary delay.mp. OR Health system delay.mp. OR Timeliness.mp. OR Interval.mp. OR Patient interval.mp. OR Patient delay.mp. OR Clinician delay.mp. OR Physician delay.mp. OR "Referral and Consultation"/ OR Referral delay.mp. OR exp *Delayed Diagnosis/ OR Diagnosis delay.mp. OR Diagnostic evaluation.mp. OR exp *Time-to-Treatment/ OR Treatment initiation.mp. OR Treatment initiation.mp. OR Treatment delay.mp OR exp *Waiting Lists/ OR Wait time.mp. OR exp "Appointments and Schedules"/ OR Wait time intervals.mp. OR Help seeking intervals.mp. OR *Prognosis/ OR Lung cancer Survival.mp. OR Prognostic implication.mp. AND limit 43 to (English language and humans and last 20 years)                                                                                                                                                                                                                                                                                                                                                                                                                                                                                                                                                                                                                                                |
| Embase   | exp lung tumor/ OR exp non-small cell lung cancer/ OR exp small cell lung cancer/ OR exp lung adenocarcinoma/ AND General Practitioners.mp. or exp general practitioner/ OR exp primary health care/ OR exp secondary health care/ OR exp tertiary health care/ OR exp public hospital/ OR exp private hospital/ OR exp cancer center/ OR exp palliative therapy/ OR exp pulmonologist/ OR exp thoracotomy/ OR exp lung lobectomy/ OR exp *patient referral/ OR exp consultation/ AND exp delayed diagnosis/ OR Primary delay.mp. OR Secondary delay.mp. OR tertiary delay.mp. OR health care system/ OR health care system delay.mp. OR timeliness.mp. OR Patient interval.mp. OR Patient delay.mp. OR Clinician delay.mp. OR Physician delay.mp. OR delayed lung cancer diagnosis.mp. OR time to diagnosis.mp. OR time to treatment.mp. or *time to treatment/ OR Treatment initiation.mp. OR treatment delay.mp. OR *hospital admission/ OR Help seeking intervals.mp. OR Lung cancer Survival.mp. OR lung cancer prognosis.mp. AND limit 41 to (human and English language and last 20 years)                                                                                                                                                                                                                                                                                                                                                                                                                                                                                                                                                                                                                                                                                                                                                                                                                                                                                                                                                                                 |
| PsycINFO | exp neoplasm/ OR (Lung Neoplasms or (lung adj3 neoplasm)).mp. [mp=title, abstract, heading word, table of contents, key concepts, original title, tests & measures] OR (lung cancer or (lung adj3 cancer)).mp. [mp=title, abstract, heading word, table of contents, key concepts, original title, tests & measures] OR Respiratory tract cancer.mp. OR Bronchogenic carcinoma.mp. OR Non-Small-Cell Lung Cancer.mp. OR Non-Small-Cell Lung Carcinoma.mp. OR Small Cell lung Cancer.mp. OR Small Cell lung Carcinoma.mp. OR (Lung cancer symptom* or (lung cancer adj3 symptom*)).mp. [mp=title, abstract, heading word, table of contents, key concepts, original title, tests & measures] AND physicians/ or exp family physicians/ or exp general practitioners/ OR (General Practitioner* or General practice or Family Practice or Family Physician*).mp. OR (Primary healthcare or Secondary healthcare or Tertiary healthcare).mp. OR (Public hospital* or Private hospital* or Special hospital* or Cancer hospital* or Cancer Center* or cancer centre*).mp. [mp=title, abstract, heading word, table of contents, key concepts, original title, tests & measures] OR exp palliative care/ OR Cancer Palliative care.mp. OR (Pulmonologist* or oncologist* or thoracic surger*).mp. [mp=title, abstract, heading word, table of contents, key concepts, original title, tests & measures] OR (Thoracotomy* or Lung lobectomy* or Pneumonectomy*).mp. [mp=title, abstract, heading word, table of contents, key concepts, original title, tests & measures] OR (Cancer surgical resection* or Surgical resection*).mp. OR (Referral or consultation).mp. OR ((Healthcare adj2 delivery) or patient admission).mp. [mp=title, abstract, heading word, table of contents, key concepts, original title, tests & measures] AND (Diagnostic timeline* or Timeliness).mp. OR (((early detection adj3 cancer) or delay* detection) adj5 cancer).mp. [mp=title, abstract, heading word, table of contents, key concepts, original title, tests & measures] OR (Primary delay* or |

| Database | Search strategy                                                                                                                                                                                                                                                                                                                                                                                                                                                                                                                                                                                                                                                                                                                                                                                                                                                                                                                                                                                                                                                                                                                                                                                                                                                                                                                                                                                                                                                                                                                                                                                                                                                                                                                    |
|----------|------------------------------------------------------------------------------------------------------------------------------------------------------------------------------------------------------------------------------------------------------------------------------------------------------------------------------------------------------------------------------------------------------------------------------------------------------------------------------------------------------------------------------------------------------------------------------------------------------------------------------------------------------------------------------------------------------------------------------------------------------------------------------------------------------------------------------------------------------------------------------------------------------------------------------------------------------------------------------------------------------------------------------------------------------------------------------------------------------------------------------------------------------------------------------------------------------------------------------------------------------------------------------------------------------------------------------------------------------------------------------------------------------------------------------------------------------------------------------------------------------------------------------------------------------------------------------------------------------------------------------------------------------------------------------------------------------------------------------------|
|          | Secondary delay* or Tertiary delay* or Health system delay*).mp. OR (Patient interval* or Patient delay* or Clinician delay* or Physician delay*).mp. OR Referral delay*.mp. OR ((diagnos* adj3 delay*) or diagnostic evaluation).mp. [mp=title, abstract, heading word, table of contents, key concepts, original title, tests & measures] OR ((time adj3 treatment or treatment initiation).mp. [mp=title, abstract, heading word, table of contents, key concepts, original title, tests & measures] OR Treatment delay*.mp. OR (wait* time* or wait* time* interval or wait* list* or appointment).mp. [mp=title, abstract, heading word, table of contents, key concepts, original title, tests & measures] OR Health service accessibility.mp. OR Help seeking intervals.mp. OR (Prognostic implication* or Lung cancer Survival*).mp. AND limit 38 to (human and English language and last 20 years)                                                                                                                                                                                                                                                                                                                                                                                                                                                                                                                                                                                                                                                                                                                                                                                                                        |
| CINAHL   | (MH "Respiratory Tract Neoplasms+") OR (MH "Lung Neoplasms+") OR (MH "Carcinoma, Non-Small-Cell Lung/DI/DT/EP/HI/MO/PR/RA/RT/RH/SU/SS/TH") OR (MH "Carcinoma, Small Cell/DI/DT/EP/HI/MO/PR/RA/RT/SU/SS/TH") OR "carcinoma, non-small-cell lung OR Carcinoma, Small Cell lung" OR "lung adenocarcinoma" AND (MH "Physicians, Family") OR (MH "Primary Health Care") OR (MH "Family Practice") OR "general practitioner or gp or family doctor or primary care" OR (MH "Secondary Health Care") OR (MH "Multidisciplinary Care Team") OR (MH "Tertiary Health Care") OR (MH "Hospitals, Public") OR (MH "Hospitals, Private") OR (MH "Hospitals, Veterans") OR (MH "Hospitals, Military") OR (MH "Hospitals, Special") OR (MH "Hospitals, Urban") OR (MH "Hospitals, Rural") OR (MH "Cancer Care Facilities") OR (MH "Oncologic Care+") OR (MH "Pulmonologists") OR (MH "Oncologists") OR "pulmonologist OR oncologist" OR (MH "Surgery, Lung+") OR (MH "Thoracic Surgery+") OR (MH "Pneumonectomy") OR (MH "Referral and Consultation+") OR (MH "Patient Admission") AND "Diagnostic timelines" OR (MH "Early Detection of Cancer") OR "early detection of cancer" OR (MH "Diagnosis, Delayed") OR "delayed diagnosis of cancer" OR "health system delay" OR "timeliness" OR "timeliness in healthcare" OR "timeliness of care" OR "patient delay" OR "patient interval" OR "Physician delay" OR (MH "Treatment Delay") OR "diagnostic delay" OR "diagnostic evaluation" OR "time to treatment" OR "treatment initiation" OR (MH "Waiting Lists") OR "wait* times" OR (MM "Appointments and Schedules") OR "prognostic implication" OR "lung cancer survival" Limiters - English Language; Published Date: 19990101-20190528; Human |
